# Supplementary material
Source: PubMed Central journal article supplement (PMC3672892)

**Folding factors and partners for the intrinsically disordered protein micro-exon  
gene 14 (MEG-14)**

**SUPPLEMENTARY MATERIAL**

**Figure S1.** SRCD spectra of MEG-14 in: a) different solvents: water (bold), 50% methanol (dot), and 50% acetonitrile (dash); b) different pHs (from pH 2 (bold) to pH 12 (dash)); c) the presence of metal ions: none (bold), ZnCl<sub>2</sub> (dot) and CaCl<sub>2</sub> (dash).

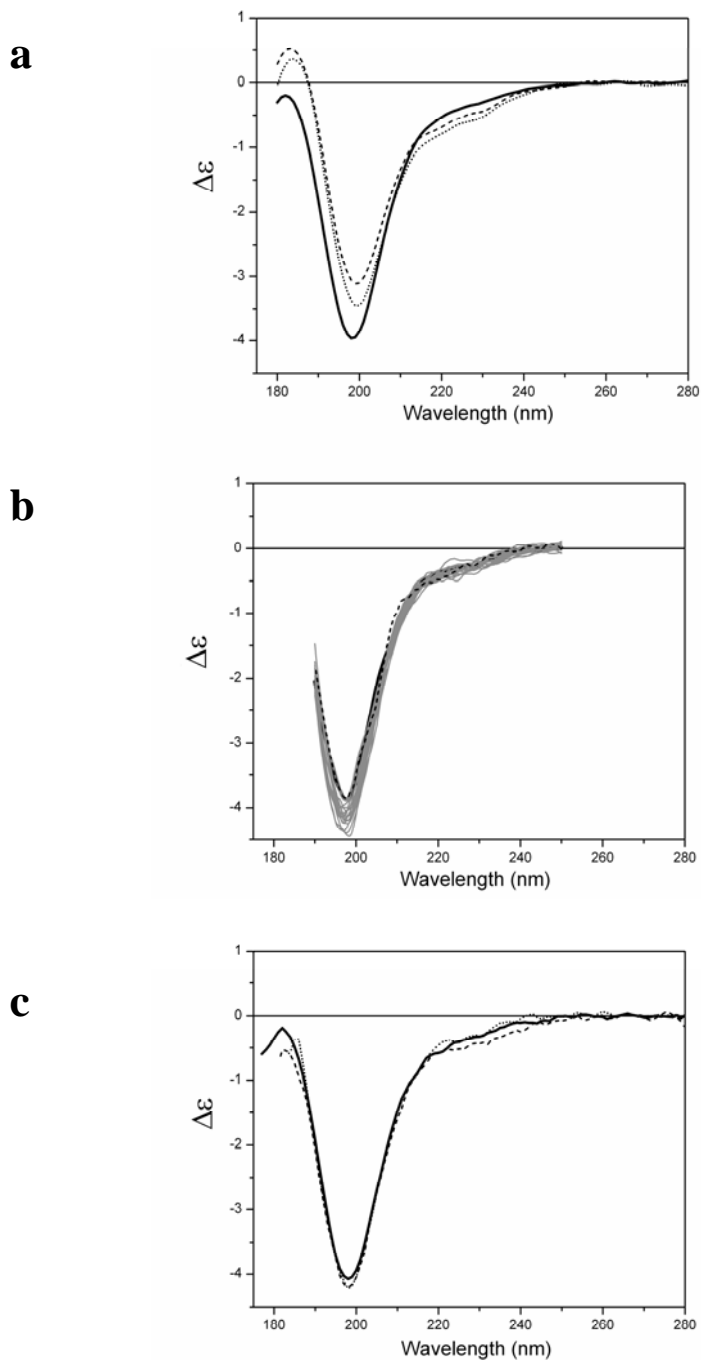

Supplement: mmc1.pdf [file mmc1.pdf]
